# Supplementary material
Source: HighWire-hosted journal article supplement (https://jnm.snmjournals.org/highwire/filestream/94068/field_highwire_adjunct_files/0/61234_Supplemental_Figures.pdf)
Supplement: 61234_Supplemental_Figures.pdf [file 61234_Supplemental_Figures.pdf]

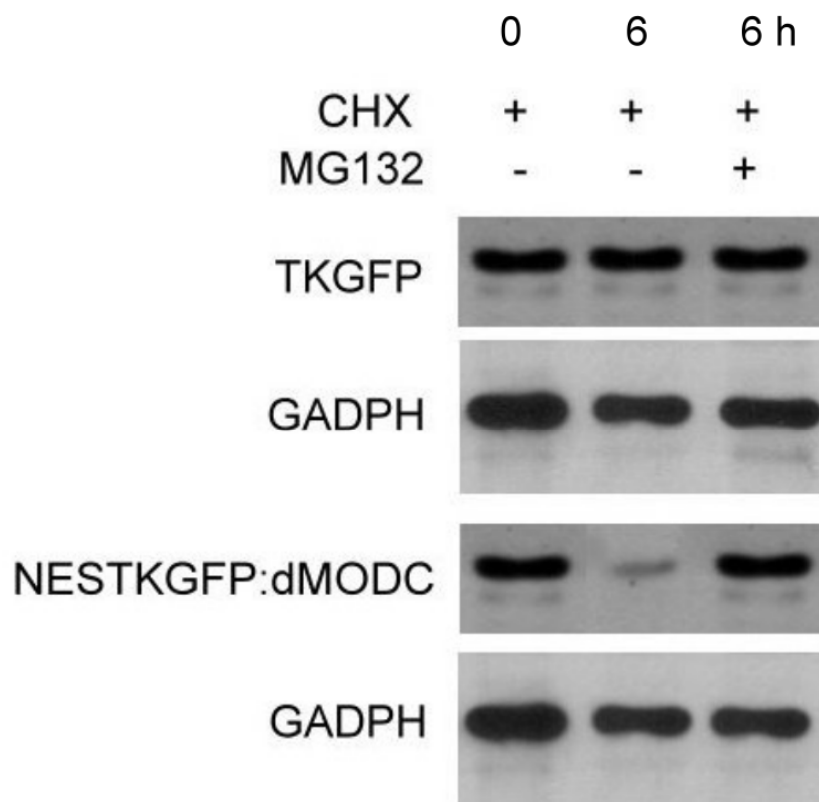

SUPPLEMENTAL FIGURE 1. Stability of TKGFP and NESTKGFP:dMODC in the presence of cycloheximide, with or without MG-132 (a 26S proteasome inhibitor), was examined by Western blot analysis. NG4TL4 cells were transfected with vectors expressing these 3 proteins. After 24 h, the transfected cells were treated with cycloheximide (50  $\mu\text{g}/\text{mL}$ ) for 6 h, with or without 40- $\mu\text{M}$  MG-132. Stability of the fusion proteins was examined by Western blot analysis.

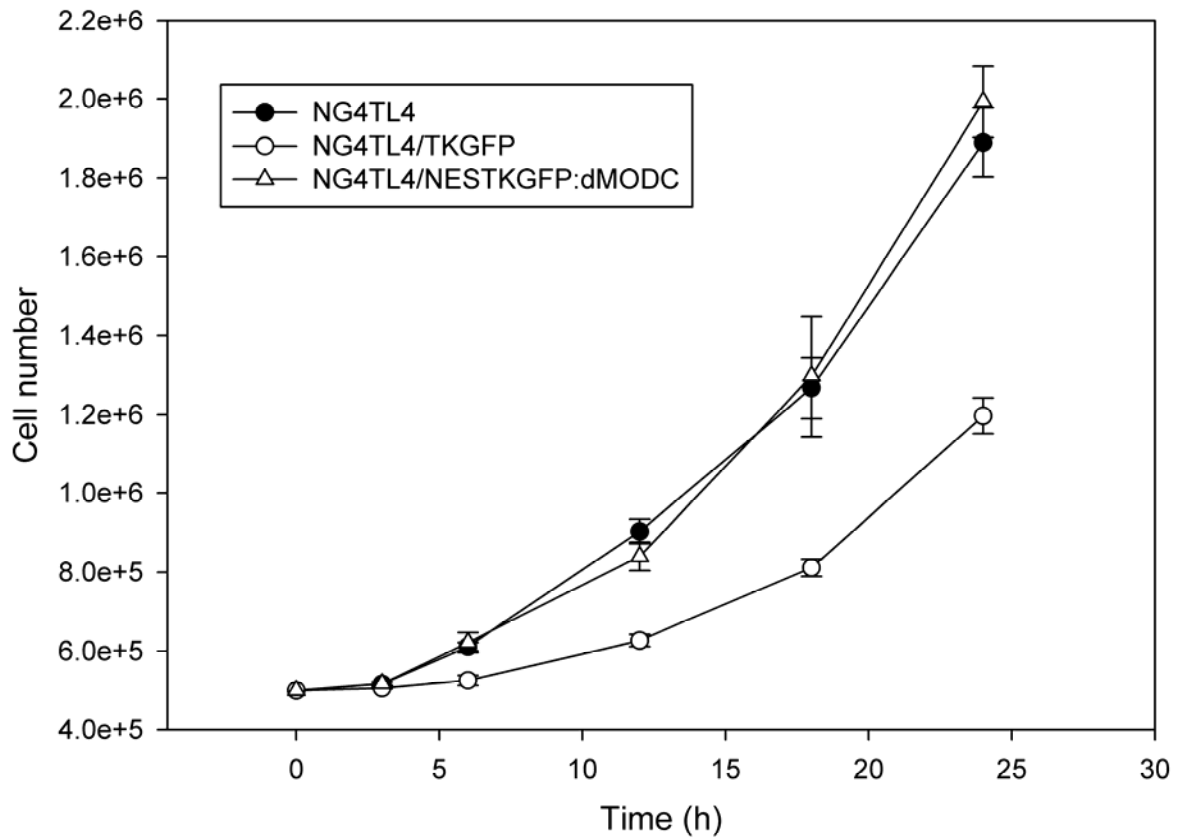

SUPPLEMENTAL FIGURE 2. In vitro cell growth of NG4TL4 control cells, TKGFP-, and NESTKGFP:dMODC-transfected NG4TL4 cells. Cell growth was analyzed by trypan blue staining. The data represent the mean  $\pm$  SD of the values obtained from 3 independent experiments.

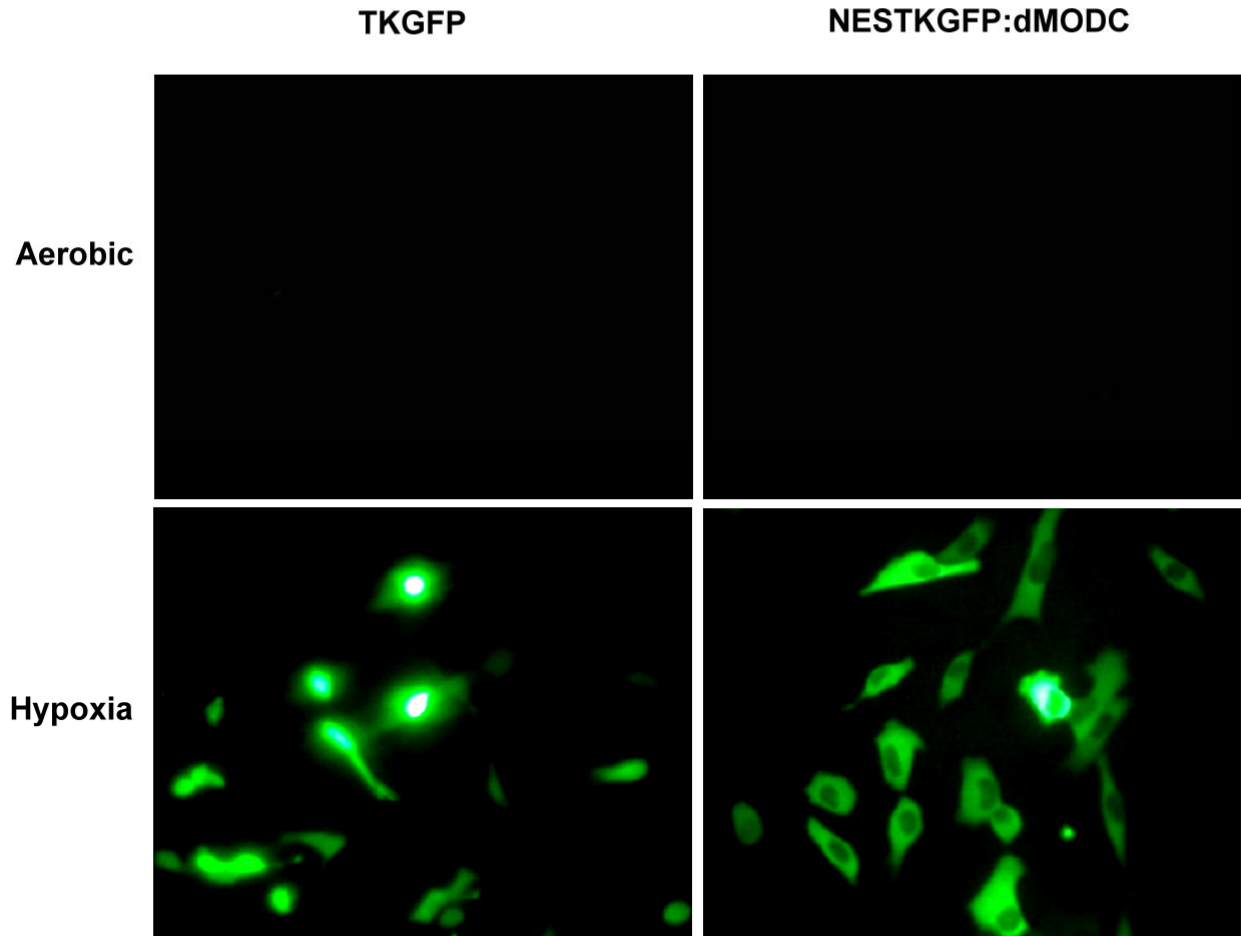

SUPPLEMENTAL FIGURE 3. Fluorescent photomicrographs of hypoxia-responsive TKGFP and NESTKGFP:dMODC expression.

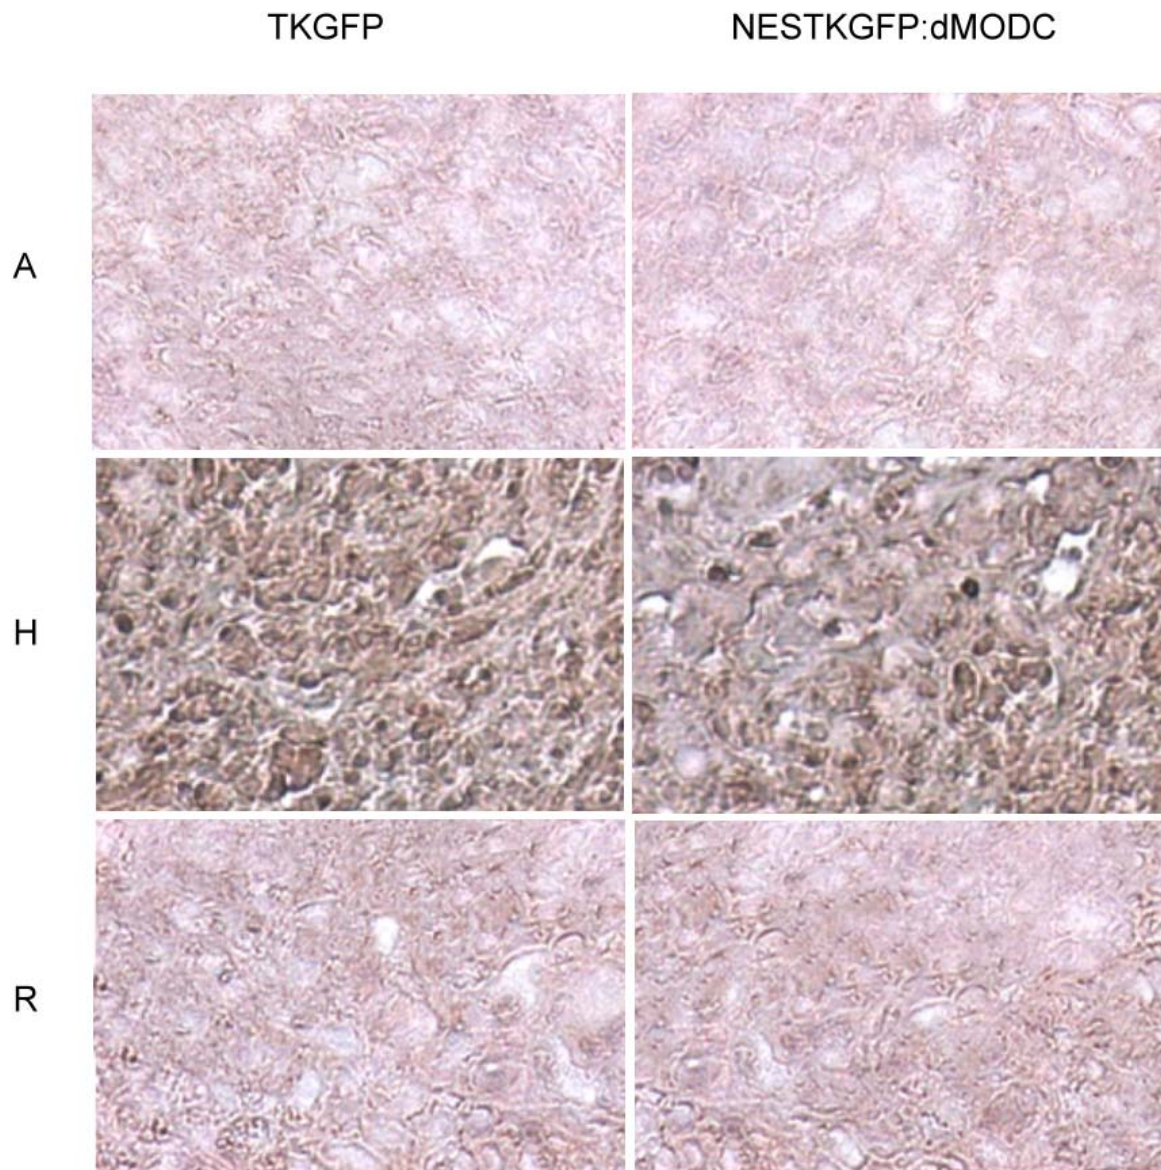

SUPPLEMENTAL FIGURE 4. Immunohistochemical analysis of HIF-1 $\alpha$  expression mediated by hypoxia and reoxygenation in TKGFP and NESTKGFP:dMODC tumors. HIF-1 $\alpha$  expression in the reporter tumors was observed under aerobic (A), hypoxic (H), and reoxygenation (R) conditions.
